# Supplementary material
Source: Springer Nature journal article supplement (https://www.springermedizin.de/resource/supplementary/12905_2013_375_MOESM5_ESM.pdf/9518586)
Supplement: MOESM5 [file 9518586]

**Disagree most****Agree most**

| -4 | -3 | -2  | -1  | 0  | +1  | +2   | +3  | +4 |
|----|----|-----|-----|----|-----|------|-----|----|
| 2* | 4  | 13  | 25* | 9  | 11  | 6    | 1** | 8  |
| 3  | 5  | 14  | 28  | 23 | 15  | 17   | 10  | 7  |
|    | 12 | 19  | 29  | 26 | 16* | 21** | 18  |    |
|    |    | 20* | 31* | 27 | 32  | 33   |     |    |
|    |    | 24  | 35  | 30 | 38  | 34   |     |    |
|    |    |     | 39  | 36 | 22  |      |     |    |
|    |    |     |     | 37 |     |      |     |    |
